# Supplementary material
Source: publisher figshare collection journal article supplement (https://tandf.figshare.com/ndownloader/files/13729559)
Supplement: Supplementary file 1 [file 13729559]

**Supplementary Materials**

**Appendix Table 1: The following covariates are used for developing the multilevel models:**

| **Variable** | **Type/Category** | **n** | **Level** | **Variable** | **Type/Category** | **n** | **Level** |
| --- | --- | --- | --- | --- | --- | --- | --- |
| Centered age of child | Continuous | **-** | Child | Number of children under-5 in household | Continuous | **-** | HH |
| Square of Centered Age of child | Continuous | **-** | Child | Birth order of a child | Continuous | - | Child |
| Sex of child | Male  Female | 4502  4251 | Child | Type of place of residence | Rural  Urban | 2674  6029 | Cluster |
| Mother’s Education | No education Primary Secondary Higher | 1687  2684  3690  692 | Mother | Mother’s Age | 20-30  Below 20  30 above | 5879  1178  1696 | Mother |
| Wealth Status | Poorest  Poorer  Middle  Richer  Richest | 1935  1711  1661  1722  1724 | HH | Division Names | Barisal  Chittagong  Dhaka  Khulna  Rajshahi  Rangpur  Sylhet | 977  1750  1445  982  1083  1107  1409 | Division |
| **Continuous Contextual Variables at Sub-district Levels** | | | | | | | |
| **Variable** | **Definition** | | | **Variable** | **Definition** | | |
| Sex_Ratio | Sex ratio | | | Kutcha.subdist | Proportion of kutcha houses | | |
| Avg.HHSize | Average household size | | | Semi_pucka.subdist | Proportion of semi-pucka houses | | |
| pop_0_4.subdist | Proportion of children aged 0-4 years | | | Tap.subdist | Proportion of houses with tap as source of drinking water | | |
| pop_5_9.subdist | Proportion of children aged 5-9 years | | | Electricity.subdist | Proportion of houses with electricity | | |
| Pucka.subdist | Proportion of Pucka houses | | | Tenacy_Owned.subdist | Proportion of households living in own house | | |
| Jhupri.subdist | Proportion of jhupri houses | | | Tenacy_Rented.subdist | Proportion of households living in rented house | | |

**Appendix Table 2: The fitted multilevel models for HAZ with regression intercept (β), standard error (SE) and their p-values.**

| **Model** | Model 4 | | | Model 5 | | | Model 6 | | | Model 7 | | | Model 8 | | | Model 9 | | |
| --- | --- | --- | --- | --- | --- | --- | --- | --- | --- | --- | --- | --- | --- | --- | --- | --- | --- | --- |
| **Variables** | β | se | p | β | se | p | β | se | p | β | se | p | β | se | p | β | se | p |
| (Intercept) | -1.64 | 0.08 | 0.00 | -1.64 | 0.08 | 0.00 | -1.61 | 0.09 | 0.00 | 0.02 | 0.33 | 0.94 | -0.02 | 0.36 | 0.95 | -0.14 | 0.38 | 0.72 |
| Child.Age.Center | -0.01 | 0.00 | 0.00 | -0.01 | 0.00 | 0.00 | -0.01 | 0.00 | 0.00 | -0.01 | 0.00 | 0.00 | -0.01 | 0.00 | 0.00 | -0.01 | 0.00 | 0.00 |
| Squared.Child.Age.Center | 0.00 | 0.00 | 0.00 | 0.00 | 0.00 | 0.00 | 0.00 | 0.00 | 0.00 | 0.00 | 0.00 | 0.00 | 0.00 | 0.00 | 0.00 | 0.00 | 0.00 | 0.00 |
| V025Rural | 0.08 | 0.04 | 0.04 | 0.07 | 0.04 | 0.08 | 0.05 | 0.04 | 0.20 | 0.05 | 0.04 | 0.17 | 0.05 | 0.04 | 0.26 | 0.04 | 0.04 | 0.34 |
| DivisionBarisal | 0.01 | 0.06 | 0.91 | 0.01 | 0.07 | 0.91 | 0.01 | 0.09 | 0.92 | -0.04 | 0.06 | 0.50 | -0.04 | 0.07 | 0.53 | -0.03 | 0.08 | 0.69 |
| DivisionChittagong | -0.01 | 0.05 | 0.79 | -0.01 | 0.06 | 0.85 | 0.01 | 0.08 | 0.87 | 0.06 | 0.06 | 0.32 | 0.06 | 0.07 | 0.36 | 0.08 | 0.08 | 0.33 |
| DivisionKhulna | 0.11 | 0.06 | 0.06 | 0.12 | 0.07 | 0.07 | 0.11 | 0.08 | 0.19 | 0.04 | 0.06 | 0.49 | 0.05 | 0.07 | 0.49 | 0.06 | 0.08 | 0.46 |
| DivisionRajshahi | 0.26 | 0.06 | 0.00 | 0.26 | 0.06 | 0.00 | 0.24 | 0.09 | 0.01 | 0.19 | 0.06 | 0.00 | 0.19 | 0.06 | 0.00 | 0.20 | 0.08 | 0.02 |
| DivisionRangpur | 0.03 | 0.06 | 0.55 | 0.04 | 0.06 | 0.58 | 0.02 | 0.09 | 0.80 | -0.05 | 0.06 | 0.43 | -0.04 | 0.06 | 0.49 | -0.04 | 0.08 | 0.64 |
| DivisionSylhet | -0.14 | 0.05 | 0.01 | -0.13 | 0.06 | 0.03 | -0.14 | 0.10 | 0.17 | 0.05 | 0.07 | 0.48 | 0.05 | 0.08 | 0.53 | 0.03 | 0.10 | 0.75 |
| Moth.EduPrimary | 0.04 | 0.05 | 0.44 | 0.04 | 0.05 | 0.44 | 0.04 | 0.05 | 0.38 | 0.03 | 0.05 | 0.46 | 0.04 | 0.05 | 0.45 | 0.04 | 0.05 | 0.40 |
| Moth.EduSecondary | 0.17 | 0.05 | 0.00 | 0.16 | 0.05 | 0.00 | 0.16 | 0.05 | 0.00 | 0.15 | 0.05 | 0.00 | 0.15 | 0.05 | 0.00 | 0.15 | 0.05 | 0.00 |
| Moth.EduHigher | 0.48 | 0.08 | 0.00 | 0.47 | 0.08 | 0.00 | 0.47 | 0.08 | 0.00 | 0.48 | 0.08 | 0.00 | 0.47 | 0.08 | 0.00 | 0.48 | 0.08 | 0.00 |
| Wealth.StatusPoorest | -0.89 | 0.06 | 0.00 | -0.88 | 0.06 | 0.00 | -0.89 | 0.06 | 0.00 | -0.92 | 0.06 | 0.00 | -0.91 | 0.06 | 0.00 | -0.90 | 0.06 | 0.00 |
| Wealth.StatusPoorer | -0.64 | 0.06 | 0.00 | -0.63 | 0.06 | 0.00 | -0.64 | 0.06 | 0.00 | -0.67 | 0.06 | 0.00 | -0.65 | 0.06 | 0.00 | -0.66 | 0.06 | 0.00 |
| Wealth.StatusMiddle | -0.54 | 0.06 | 0.00 | -0.53 | 0.06 | 0.00 | -0.55 | 0.06 | 0.00 | -0.58 | 0.06 | 0.00 | -0.56 | 0.06 | 0.00 | -0.57 | 0.06 | 0.00 |
| Wealth.StatusRicher | -0.36 | 0.05 | 0.00 | -0.36 | 0.05 | 0.00 | -0.38 | 0.05 | 0.00 | -0.39 | 0.05 | 0.00 | -0.39 | 0.05 | 0.00 | -0.39 | 0.05 | 0.00 |
| No.Chil.U5.Family | 0.12 | 0.03 | 0.00 | 0.12 | 0.03 | 0.00 | 0.12 | 0.03 | 0.00 | 0.12 | 0.03 | 0.00 | 0.12 | 0.03 | 0.00 | 0.12 | 0.03 | 0.00 |
| Mot.AgeBelow 20 | -0.24 | 0.05 | 0.00 | -0.23 | 0.05 | 0.00 | -0.24 | 0.05 | 0.00 | -0.23 | 0.05 | 0.00 | -0.23 | 0.05 | 0.00 | -0.23 | 0.05 | 0.00 |
| Mot.Age30 above | 0.17 | 0.05 | 0.00 | 0.17 | 0.05 | 0.00 | 0.17 | 0.05 | 0.00 | 0.17 | 0.05 | 0.00 | 0.17 | 0.05 | 0.00 | 0.17 | 0.05 | 0.00 |
| BORD | -0.04 | 0.01 | 0.00 | -0.04 | 0.01 | 0.00 | -0.04 | 0.01 | 0.00 | -0.04 | 0.01 | 0.00 | -0.04 | 0.01 | 0.00 | -0.04 | 0.01 | 0.00 |
| Sex_Ratio | - | - | - | - | - | - | - | - | - | -0.19 | 0.04 | 0.00 | -0.19 | 0.05 | 0.00 | -0.17 | 0.05 | 0.00 |
| Avg.HHSize | - | - | - | - | - | - | - | - | - | -0.01 | 0.00 | 0.00 | -0.01 | 0.00 | 0.00 | -0.01 | 0.00 | 0.01 |

**Appendix Table 3: The fitted multilevel models for WAZ with regression intercept (β), standard error (SE) and their p-values.**

| **Model** | Model 4 | | | Model 5 | | | Model 6 | | | Model 7 | | | Model 8 | | | Model 9 | | |
| --- | --- | --- | --- | --- | --- | --- | --- | --- | --- | --- | --- | --- | --- | --- | --- | --- | --- | --- |
| **Variables** | β | se | p | β | se | p | β | se | p | β | se | p | β | se | p | β | se | p |
| (Intercept) | -1.39 | 0.07 | 0.00 | -1.39 | 0.07 | 0.00 | -1.37 | 0.08 | 0.00 | 6.38 | 2.22 | 0.00 | 6.64 | 2.55 | 0.01 | 6.56 | 2.54 | 0.01 |
| Child.Age.Center | -0.01 | 0.00 | 0.00 | -0.01 | 0.00 | 0.00 | -0.01 | 0.00 | 0.00 | -0.01 | 0.00 | 0.00 | -0.01 | 0.00 | 0.00 | -0.01 | 0.00 | 0.00 |
| Squared.Child.Age.Center | 0.00 | 0.00 | 0.00 | 0.00 | 0.00 | 0.00 | 0.00 | 0.00 | 0.00 | 0.00 | 0.00 | 0.00 | 0.00 | 0.00 | 0.00 | 0.00 | 0.00 | 0.00 |
| B4Female | -0.06 | 0.02 | 0.01 | -0.05 | 0.02 | 0.02 | -0.05 | 0.02 | 0.03 | -0.06 | 0.02 | 0.02 | -0.05 | 0.02 | 0.03 | -0.05 | 0.02 | 0.03 |
| DivisionBarisal | 0.00 | 0.05 | 0.93 | 0.00 | 0.06 | 0.94 | -0.01 | 0.09 | 0.87 | 0.07 | 0.06 | 0.20 | 0.07 | 0.06 | 0.25 | 0.06 | 0.09 | 0.50 |
| DivisionChittagong | -0.06 | 0.04 | 0.17 | -0.05 | 0.05 | 0.31 | -0.03 | 0.08 | 0.67 | -0.10 | 0.05 | 0.04 | -0.09 | 0.05 | 0.09 | -0.07 | 0.08 | 0.36 |
| DivisionKhulna | 0.09 | 0.05 | 0.08 | 0.09 | 0.06 | 0.11 | 0.08 | 0.08 | 0.32 | 0.11 | 0.06 | 0.09 | 0.10 | 0.07 | 0.14 | 0.08 | 0.09 | 0.40 |
| DivisionRajshahi | 0.06 | 0.05 | 0.21 | 0.06 | 0.06 | 0.28 | 0.03 | 0.08 | 0.70 | 0.01 | 0.06 | 0.90 | 0.01 | 0.06 | 0.89 | -0.02 | 0.08 | 0.79 |
| DivisionRangpur | 0.05 | 0.05 | 0.31 | 0.04 | 0.06 | 0.50 | 0.02 | 0.08 | 0.78 | 0.10 | 0.06 | 0.09 | 0.09 | 0.06 | 0.17 | 0.08 | 0.08 | 0.37 |
| DivisionSylhet | -0.19 | 0.05 | 0.00 | -0.19 | 0.05 | 0.00 | -0.19 | 0.09 | 0.04 | -0.19 | 0.06 | 0.00 | -0.20 | 0.07 | 0.01 | -0.22 | 0.10 | 0.04 |
| Moth.EduPrimary | 0.02 | 0.04 | 0.69 | 0.01 | 0.04 | 0.72 | 0.02 | 0.04 | 0.60 | 0.01 | 0.04 | 0.82 | 0.01 | 0.04 | 0.83 | 0.02 | 0.04 | 0.69 |
| Moth.EduSecondary | 0.19 | 0.04 | 0.00 | 0.18 | 0.04 | 0.00 | 0.18 | 0.04 | 0.00 | 0.16 | 0.04 | 0.00 | 0.16 | 0.04 | 0.00 | 0.17 | 0.04 | 0.00 |
| Moth.EduHigher | 0.46 | 0.06 | 0.00 | 0.45 | 0.06 | 0.00 | 0.45 | 0.06 | 0.00 | 0.44 | 0.06 | 0.00 | 0.43 | 0.06 | 0.00 | 0.43 | 0.06 | 0.00 |
| Wealth.StatusPoorest | -0.70 | 0.05 | 0.00 | -0.70 | 0.05 | 0.00 | -0.70 | 0.05 | 0.00 | -0.70 | 0.05 | 0.00 | -0.69 | 0.05 | 0.00 | -0.69 | 0.05 | 0.00 |
| Wealth.StatusPoorer | -0.57 | 0.05 | 0.00 | -0.56 | 0.05 | 0.00 | -0.56 | 0.05 | 0.00 | -0.57 | 0.05 | 0.00 | -0.56 | 0.05 | 0.00 | -0.56 | 0.05 | 0.00 |
| Wealth.StatusMiddle | -0.47 | 0.05 | 0.00 | -0.46 | 0.05 | 0.00 | -0.47 | 0.05 | 0.00 | -0.48 | 0.05 | 0.00 | -0.47 | 0.05 | 0.00 | -0.47 | 0.05 | 0.00 |
| Wealth.StatusRicher | -0.29 | 0.04 | 0.00 | -0.29 | 0.04 | 0.00 | -0.29 | 0.04 | 0.00 | -0.31 | 0.04 | 0.00 | -0.30 | 0.04 | 0.00 | -0.31 | 0.04 | 0.00 |
| No.Chil.U5.Family | 0.10 | 0.03 | 0.00 | 0.09 | 0.03 | 0.00 | 0.10 | 0.03 | 0.00 | 0.10 | 0.03 | 0.00 | 0.10 | 0.03 | 0.00 | 0.10 | 0.03 | 0.00 |
| Mot.AgeBelow 20 | -0.15 | 0.04 | 0.00 | -0.14 | 0.04 | 0.00 | -0.15 | 0.04 | 0.00 | -0.14 | 0.04 | 0.00 | -0.14 | 0.04 | 0.00 | -0.15 | 0.04 | 0.00 |
| Mot.Age30 above | 0.07 | 0.04 | 0.07 | 0.07 | 0.04 | 0.07 | 0.08 | 0.04 | 0.06 | 0.06 | 0.04 | 0.11 | 0.07 | 0.04 | 0.10 | 0.07 | 0.04 | 0.08 |
| BORD | -0.03 | 0.01 | 0.01 | -0.03 | 0.01 | 0.02 | -0.03 | 0.01 | 0.02 | -0.02 | 0.01 | 0.03 | -0.02 | 0.01 | 0.03 | -0.02 | 0.01 | 0.03 |
| V025Rural | 0.01 | 0.03 | 0.82 | 0.00 | 0.04 | 0.94 | -0.01 | 0.04 | 0.79 | -0.04 | 0.04 | 0.32 | -0.04 | 0.04 | 0.37 | -0.03 | 0.04 | 0.39 |
| pop_0_4.subdist | - | - | - | - | - | - | - | - | - | 0.05 | 0.02 | 0.02 | 0.06 | 0.03 | 0.04 | 0.04 | 0.03 | 0.15 |
| pop_5_9.subdist | - | - | - | - | - | - | - | - | - | -0.06 | 0.02 | 0.01 | -0.06 | 0.03 | 0.01 | -0.05 | 0.03 | 0.05 |
| Pucka.subdist | - | - | - | - | - | - | - | - | - | -0.07 | 0.02 | 0.00 | -0.07 | 0.03 | 0.00 | -0.07 | 0.03 | 0.01 |
| Semi_pucka.subdist | - | - | - | - | - | - | - | - | - | -0.07 | 0.02 | 0.00 | -0.07 | 0.03 | 0.00 | -0.07 | 0.03 | 0.01 |
| Kutcha.subdist | - | - | - | - | - | - | - | - | - | -0.07 | 0.02 | 0.00 | -0.07 | 0.03 | 0.01 | -0.07 | 0.03 | 0.01 |
| Jhupri.subdist | - | - | - | - | - | - | - | - | - | -0.07 | 0.02 | 0.00 | -0.07 | 0.03 | 0.00 | -0.07 | 0.03 | 0.01 |
| Electricity.subdist | - | - | - | - | - | - | - | - | - | 0.01 | 0.00 | 0.00 | 0.01 | 0.00 | 0.00 | 0.01 | 0.00 | 0.00 |
| Tenacy_Rented.subdist | - | - | - | - | - | - | - | - | - | -0.02 | 0.00 | 0.00 | -0.02 | 0.01 | 0.00 | -0.02 | 0.01 | 0.00 |
| Tenacy_Owned.subdist | - | - | - | - | - | - | - | - | - | -0.01 | 0.00 | 0.01 | -0.01 | 0.00 | 0.03 | -0.01 | 0.01 | 0.02 |
| Tap.subdist | - | - | - | - | - | - | - | - | - | 0.00 | 0.00 | 0.02 | 0.00 | 0.00 | 0.06 | 0.00 | 0.00 | 0.11 |

**Appendix Table 4: The fitted multilevel models for WHZ with regression intercept (β), standard error (SE) and their p-values.**

| **Model** | Model 4 | | | Model 5 | | | Model 6 | | | Model 7 | | | Model 8 | | | Model 9 | | |
| --- | --- | --- | --- | --- | --- | --- | --- | --- | --- | --- | --- | --- | --- | --- | --- | --- | --- | --- |
| **Variables** | β | se | p | β | se | p | β | se | p | β | se | p | β | se | p | β | se | p |
| (Intercept) | -0.78 | 0.06 | 0.00 | -0.77 | 0.07 | 0.00 | -0.77 | 0.08 | 0.00 | 6.48 | 2.41 | 0.01 | 6.32 | 2.97 | 0.03 | 5.96 | 2.98 | 0.05 |
| Child.Age.Center | -0.01 | 0.00 | 0.00 | -0.01 | 0.00 | 0.00 | -0.01 | 0.00 | 0.00 | -0.01 | 0.00 | 0.00 | -0.01 | 0.00 | 0.00 | -0.01 | 0.00 | 0.00 |
| Squared.Child.Age.Center | 0.00 | 0.00 | 0.00 | 0.00 | 0.00 | 0.01 | 0.00 | 0.00 | 0.01 | 0.00 | 0.00 | 0.00 | 0.00 | 0.00 | 0.01 | 0.00 | 0.00 | 0.01 |
| V025Rural | -0.06 | 0.03 | 0.08 | -0.06 | 0.04 | 0.14 | -0.06 | 0.04 | 0.16 | -0.07 | 0.04 | 0.05 | -0.07 | 0.05 | 0.15 | -0.06 | 0.05 | 0.18 |
| DivisionBarisal | -0.01 | 0.05 | 0.86 | -0.01 | 0.07 | 0.86 | -0.02 | 0.09 | 0.81 | 0.13 | 0.06 | 0.03 | 0.13 | 0.07 | 0.08 | 0.12 | 0.09 | 0.22 |
| DivisionChittagong | -0.08 | 0.05 | 0.09 | -0.07 | 0.06 | 0.24 | -0.06 | 0.08 | 0.48 | -0.22 | 0.06 | 0.00 | -0.21 | 0.07 | 0.00 | -0.20 | 0.09 | 0.03 |
| DivisionKhulna | 0.02 | 0.05 | 0.69 | 0.02 | 0.06 | 0.75 | 0.01 | 0.08 | 0.86 | 0.13 | 0.07 | 0.05 | 0.13 | 0.08 | 0.13 | 0.10 | 0.10 | 0.30 |
| DivisionRajshahi | -0.14 | 0.05 | 0.01 | -0.14 | 0.06 | 0.03 | -0.16 | 0.09 | 0.07 | -0.10 | 0.06 | 0.10 | -0.09 | 0.07 | 0.20 | -0.12 | 0.09 | 0.21 |
| DivisionRangpur | 0.06 | 0.05 | 0.27 | 0.03 | 0.06 | 0.60 | 0.03 | 0.08 | 0.74 | 0.23 | 0.06 | 0.00 | 0.21 | 0.08 | 0.01 | 0.21 | 0.09 | 0.03 |
| DivisionSylhet | -0.15 | 0.05 | 0.00 | -0.16 | 0.06 | 0.01 | -0.16 | 0.10 | 0.10 | -0.28 | 0.07 | 0.00 | -0.29 | 0.09 | 0.00 | -0.27 | 0.11 | 0.02 |
| Moth.EduPrimary | 0.00 | 0.04 | 0.99 | -0.01 | 0.04 | 0.89 | 0.00 | 0.04 | 0.93 | 0.00 | 0.04 | 0.93 | -0.01 | 0.04 | 0.83 | -0.01 | 0.04 | 0.87 |
| Moth.EduSecondary | 0.14 | 0.04 | 0.00 | 0.13 | 0.04 | 0.00 | 0.13 | 0.04 | 0.00 | 0.13 | 0.04 | 0.00 | 0.12 | 0.04 | 0.00 | 0.12 | 0.04 | 0.01 |
| Moth.EduHigher | 0.27 | 0.07 | 0.00 | 0.26 | 0.07 | 0.00 | 0.26 | 0.07 | 0.00 | 0.26 | 0.07 | 0.00 | 0.26 | 0.07 | 0.00 | 0.25 | 0.07 | 0.00 |
| Wealth.StatusPoorest | -0.25 | 0.05 | 0.00 | -0.25 | 0.06 | 0.00 | -0.25 | 0.06 | 0.00 | -0.21 | 0.06 | 0.00 | -0.21 | 0.06 | 0.00 | -0.22 | 0.06 | 0.00 |
| Wealth.StatusPoorer | -0.28 | 0.05 | 0.00 | -0.27 | 0.05 | 0.00 | -0.27 | 0.05 | 0.00 | -0.25 | 0.05 | 0.00 | -0.25 | 0.06 | 0.00 | -0.25 | 0.06 | 0.00 |
| Wealth.StatusMiddle | -0.24 | 0.05 | 0.00 | -0.23 | 0.05 | 0.00 | -0.23 | 0.05 | 0.00 | -0.22 | 0.05 | 0.00 | -0.21 | 0.05 | 0.00 | -0.21 | 0.05 | 0.00 |
| Wealth.StatusRicher | -0.12 | 0.05 | 0.01 | -0.11 | 0.05 | 0.02 | -0.11 | 0.05 | 0.02 | -0.11 | 0.05 | 0.02 | -0.11 | 0.05 | 0.02 | -0.11 | 0.05 | 0.02 |
| Avg.HHSize | - | - | - | - | - | - | - | - | - | 0.16 | 0.05 | 0.00 | 0.15 | 0.06 | 0.01 | 0.14 | 0.06 | 0.02 |
| Pucka.subdist | - | - | - | - | - | - | - | - | - | -0.09 | 0.02 | 0.00 | -0.08 | 0.03 | 0.00 | -0.08 | 0.03 | 0.01 |
| Semi_pucka.subdist | - | - | - | - | - | - | - | - | - | -0.08 | 0.02 | 0.00 | -0.08 | 0.03 | 0.01 | -0.08 | 0.03 | 0.01 |
| Kutcha.subdist | - | - | - | - | - | - | - | - | - | -0.08 | 0.02 | 0.00 | -0.08 | 0.03 | 0.01 | -0.08 | 0.03 | 0.01 |
| Jhupri.subdist | - | - | - | - | - | - | - | - | - | -0.08 | 0.02 | 0.00 | -0.08 | 0.03 | 0.01 | -0.07 | 0.03 | 0.02 |
| pop_0_4.subdist | - | - | - | - | - | - | - | - | - | 0.07 | 0.03 | 0.01 | 0.06 | 0.03 | 0.04 | 0.04 | 0.03 | 0.17 |
| pop_5_9.subdist | - | - | - | - | - | - | - | - | - | -0.07 | 0.02 | 0.01 | -0.06 | 0.03 | 0.05 | -0.04 | 0.03 | 0.17 |
| Electricity.subdist | - | - | - | - | - | - | - | - | - | 0.01 | 0.00 | 0.00 | 0.01 | 0.00 | 0.00 | 0.01 | 0.00 | 0.00 |
| Tap.subdist | - | - | - | - | - | - | - | - | - | 0.00 | 0.00 | 0.01 | 0.00 | 0.00 | 0.04 | 0.00 | 0.00 | 0.06 |
| Tenacy_Rented.subdist | - | - | - | - | - | - | - | - | - | -0.01 | 0.00 | 0.00 | -0.01 | 0.00 | 0.02 | -0.01 | 0.00 | 0.03 |
